# Supplementary material for: High-fidelity SaCas9 identified by directional screening in human cells
Source: PLoS Biol. 2020 Jul 9;18(7):e3000747. doi: 10.1371/journal.pbio.3000747 (PMC7347106; doi:10.1371/journal.pbio.3000747)
Supplement: S1 Data — (XLSX) [file pbio.3000747.s019.xlsx]

## Sheet: site1
	1st	2nd	3rd	Mean	SEM
1A	81.3754	101.579	84.8138	89.256	6.2409
1G	87.9656	107.895	92.8367	96.2323	5.99834
1T	130.086	116.316	128.653	125.018	4.37089
2C	93.1232	100.526	95.2	96.2832	2.20465
2G	81.9484	98.1579	103.733	94.6132	6.53374
2T	71.3467	84.2105	76.8	77.4524	3.72777
3C	74.7851	86.0526	78.9333	79.9237	3.29013
3G	79.3696	96.0526	82.4	85.9408	5.13106
3T	92.2636	99.2105	97.3333	96.2692	2.07479
4A	94.5559	104.737	97.0667	98.7865	3.0622
4C	34.0974	38.4211	40	37.5062	1.76426
4T	87.9656	95.2632	88	90.4096	2.4268
5A	89.9713	90.5263	91.2	90.5659	0.355233
5C	56.447	62.8947	55.2	58.1806	2.38441
5T	93.1232	98.9474	97.6	96.5569	1.76033
6A	126.934	104.741	110.667	114.114	6.63432
6C	98.5673	87.069	78.9333	88.1899	5.69549
6T	116.332	93.9655	94.6667	101.655	7.34155
7A	107.163	84.2672	92	94.4769	6.72455
7G	61.3181	56.681	49.6	55.8664	3.40715
7T	100.573	87.7155	92.8	93.6962	3.73861
8A	69.0544	62.931	68.8	66.9285	2.00008
8C	11.7479	11.0526	13.0667	11.9557	0.590618
8T	11.4613	9.73684	11.7333	10.9772	0.625113
9C	76.5043	74.0053	76.5333	75.681	0.837879
9G	58.7393	60.7427	58.6667	59.3829	0.680238
9T	68.4814	68.9655	63.7333	67.0601	1.66923
10A	58.7393	47.3684	65.0667	57.0581	5.17773
10C	48.9971	38.9474	48	45.3148	3.19672
10T	59.3123	51.0526	65.0667	58.4772	4.067
11A	33.2378	30.7895	45.0667	36.3647	4.40804
11C	14.8997	12.8947	18.6667	15.487	1.69189
11T	37.8223	27.1053	41.6	35.5092	4.34117
12C	14.0401	10.2632	13.6	12.6344	1.19242
12G	36.1032	32.3684	42.6667	37.0461	3.01
12T	28.6533	31.8421	40	33.4985	3.37859
13A	44.6991	44.7368	55.4667	48.3009	3.58291
13C	6.87679	7.63158	13.0667	9.19168	1.94971
13T	18.3381	18.9474	29.8667	22.384	3.74544
14A	18.9112	21.3158	25.0667	21.7645	1.79105
14G	32.9513	41.0526	48	40.668	4.34844
14T	41.5473	56.3158	53.3333	50.3988	4.50873
15A	28.6533	32.1053	38.6667	33.1417	2.9367
15C	33.8109	33.6842	43.2	36.8984	3.15103
15G	29.7994	30	34.4	31.3998	1.50121
16A	42.4069	40	47.2	43.2023	2.11617
16C	12.3209	12.1053	17.6	14.0087	1.79672
16T	29.7994	28.9474	37.0667	31.9378	2.57619
17A	18.0516	20	26.1333	21.395	2.43503
17C	65.3295	65.7895	72.5333	67.8841	2.3284
17G	62.4642	62.8947	68	64.453	1.77786
18A	10.3152	7.10526	15.7333	11.0513	2.51775
18C	53.8682	55.2632	53.6	54.2438	0.515533
18G	107.45	89.4737	89.3333	95.419	6.01559
19A	6.59026	5.26316	12.5333	8.12892	2.23528
19G	8.59599	3.42105	11.4667	7.8279	2.35411
19T	13.467	10.5263	17.8667	13.9533	2.13288
20C	32.0917	37.3684	41.8667	37.1089	2.82477
20G	103.152	98.1579	101.333	100.881	1.45926
20T	12.894	11.0526	18.9333	14.2933	2.38012
21A	6.01719	5	8.8	6.60573	1.13575
21G	31.2321	28.6842	33.6	31.1721	1.41938
21T	7.16332	6.84211	9.33333	7.77959	0.782387

## Sheet: site2
	1st	2nd	3rd	4th	Mean	SEM
1A	77.3467	79.5	78.7137		78.5201	1.08963
1C	61.0763	74.1463	71.3671		68.8632	3.97526
1T	92.8661	114.6	107.317	92.0344	101.704	5.54844
2A	65.8323	82.9635	87.1545	67.9494	75.9749	5.33154
2G	69.0864	95.3472	90.4065	78.6598	83.375	5.91025
2T	93.8673	119.35	95.8558		103.024	8.18284
3A	97.1214	117.073	113.428		109.208	6.13404
3G	96.1202	115.122	99.085		103.442	5.90217
3T	97.3717	115.605	115.772	107.616	109.091	4.34539
4A	66.8539	67.8617	82.4806	66.7966	70.9982	3.83528
4C	28.3708	17.9845	18.5503		21.6352	3.37176
4T	67.9775	64.0228	58.2946	50.4806	60.1939	3.79913
5A	47.5594	48.0315	42.9268	37.056	43.8934	2.55357
5C	80.1001	87.9742	78.0488	69.1335	78.8142	3.8715
5G	44.0551	50.4653	38.6992	35.8181	42.2594	3.22395
6C	49.0613	52.1117	48.7805	34.1496	46.0258	4.02993
6G	83.6045	84.252	77.0732	74.9462	79.969	2.33051
6T	64.5807	61.3457	52.0325	43.8913	55.4626	4.68519
7A	89.3258	85.5964	96.4341	82.411	88.4419	3.01558
7C	37.9213	28.5533	24.4961	21.8498	28.2052	3.51986
7T	59.2697	57.9315	45.5814	46.8953	52.4195	3.58914
8A	93.3667	107.516	104.39	102.53	101.951	3.04063
8C	16.02	16.8218	13.9837	8.15393	13.7449	1.95702
8T	34.0426	27.7738	21.1382	13.6706	24.1563	4.37686
9A	71.0889	66.3565	68.323		68.5894	2.37742
9C	73.3417	65.2827	78.0488	69.887	71.64	2.69963
9G	72.5907	68.2892	44.878	69.0527	63.7027	6.34444
10A	66.573	56.2817	60.155	61.0808	61.0226	2.12209
10G	103.09	102.348	110.388	92.8813	102.177	3.59035
10T	99.4382	89.0863	98.9147	94.1024	95.3854	2.41879
11C	62.9921	51.9	45.8827		53.5916	5.01097
11G	93.3667	93.2713	88.9935		91.8772	1.44208
11T	73.8423	59.0551	50.6728		61.1901	6.77312
12A	96.3705	100.358	102.114	92.8687	97.9277	2.07059
12C	51.5645	35.0036	37.3984	27.3143	37.8202	5.0612
12T	89.612	69.7924	69.5935	77.1259	76.531	4.69933
13A	84.8315	76.5863	74.4186	67.7838	75.905	3.51554
13C	35.1124	17.9569	27.907	18.966	24.9855	4.04892
13T	50.2809	49.3655	35.969	37.3863	43.2504	3.81038
14A	58.8235	46.3851	53.0081	39.6663	49.4708	4.1396
14C	45.0563	22.9062	14.6341	14.9085	24.3763	7.15526
14T	45.0563	26.5569	36.748	28.31	34.1678	4.25692
15A	59.8248	32.1403	40	36.2217	42.0467	6.13946
15C	66.6	38.1345	58.6047	57.0018	55.0852	6.02755
15G	39.8876	31.7893	23.876	24.1102	29.9158	3.79839
16A	72.7528	57.1066	70.7	54.118	63.6693	4.71026
16C	46.0674	27.3477	24.8062	25.0714	30.8232	5.11332
16T		49.6827	41.5504	43.9335	45.0555	2.41371
17A	37.0787	28.6802	32.5581	31.2809	32.3995	1.75604
17C	25.8427	26.967	18.6047	20.0312	22.8614	2.07915
17T	26.6854	29.8223	28.2171	24.318	27.2607	1.17143
18A	29.4944	19.1624	22.6357	12.8085	21.0252	3.47975
18C	67.4157	61.9289	62.9457	57.8072	62.5244	1.97292
18G	105.618	111.548	123.411	105.794	111.593	4.17329
19A	40.4494	19.2259	12.093	17.615	22.3458	6.22479
19G	48.3146	42.0685	18.6047	20.9405	32.4821	7.46302
19T	38.4831	22.6523	17.3643	19.0699	24.3924	4.82442
20C	49.4382	34.1371	27.5969	34.3726	36.3862	4.62529
20G	102.528	101.396	94.2636	106.833	101.255	2.60823
20T	35.9137	16.124	28.6828		26.9068	5.78139
21A	25.2809	13.8959	23.5659	16.4718	19.8036	2.741
21G	80.4569	65.7364	72.6163		72.9365	4.25243
21T	34.5506	22.9061	14.5736	16.1341	22.0411	4.54506

## Sheet: site3
	1st	2nd	3rd	Mean	SEM
1A	102.558	86.5421	80.597	89.8992	6.55815
1C	45.3838	36.6355	44.473	42.1641	2.77676
1T	64.7386	64.8598	55.0107	61.5364	3.26304
2A	76.307	75.1402	72.9211	74.7894	0.993034
2G	71.7757	73.1343	77.892	74.2674	1.85429
2T	91.7738	85.4206	95.5224	90.9056	2.94828
3C	34.5794	29.6375	34.9614	33.0595	1.71452
3G	96.1068	93.271	82.516	90.6313	4.13939
3T	83.1776	81.0235	81.7481	81.983	0.63284
4C	56.0623	51.215	53.7275	53.6683	1.39962
4G	100.935	92.7505	101.285	98.3235	2.78832
4T	91.6574	85.7944	81.0235	86.1584	3.07515
5A	24.0267	25.6075	21.7484	23.7942	1.12007
5G	64.486	61.6205	71.7224	65.9429	3.00578
5T	95.7009	103.625	116.71	105.345	6.12535
6C	86.3181	78.1308	69.4087	77.9526	4.88213
6G	94.327	89.9065	100	94.7445	2.9212
6T	88.3204	92.8972	94.3445	91.854	1.81555
7A	91.4349	93.8318	88.9126	91.3931	1.4202
7C	107.008	102.243	101.279	103.51	1.77086
7G	89.4327	86.5421	79.9574	85.3107	2.80373
8A	16.0178	24.1121	16.6311	18.9204	2.60193
8G	61.1791	63.1776	53.9846	59.4471	2.79152
8T	53.4579	55.6503	56.0411	55.0498	0.803883
9A	16.2403	27.6636	26.4392	23.4477	3.621
9G	24.2492	31.028	25.5864	26.9545	2.07302
9T	68.2981	74.9533	69.4087	70.8867	2.0584
10A	71.5888	75.0533	76.0925	74.2449	1.36151
10C	88.0374	92.5373	94.0874	91.554	1.81437
10G	48.972	49.0405	46.5296	48.1807	0.825795
11A	103.893	98.5047	99.7868	100.728	1.6252
11C	17.1301	20.1869	16.4179	17.9117	1.15606
11T	70.0779	66.1682	66.581	67.609	1.24016
12A	88.785	89.1258	96.6581	91.523	2.56944
12C	34.4828	34.9533	40.3599	36.5986	1.88553
12T	72.525	69.3458	68.8946	70.2551	1.14239
13A	105.006	89.9065	87.42	94.1107	5.49451
13C	18.02	14.0187	13.0064	15.015	1.53065
13T	27.1413	25.7944	24.307	25.7476	0.818507
14A	98.6916	108.316	100.514	102.507	2.9515
14C	59.6218	53.6449	56.29	56.5189	1.72919
14T	85.4283	78.5047	78.8913	80.9414	2.2462
15A	112.125	85.7944	96.6581	98.1924	7.63949
15G	95.8843	87.6636	105.141	96.2298	5.04837
15T	102.056	92.3241	104.37	99.5834	3.69064
16C	71.8576	67.2897	53.4704	64.2059	5.52734
16G	103.226	94.3925	100.257	99.2918	2.59522
16T	95.1402	92.7505	103.342	97.0775	3.20725
17A	55.514	51.1727	52.1851	52.9573	1.31135
17G	87.6529	77.3832	87.1465	84.0609	3.34205
17T	95.4394	86.9159	85.5011	89.2854	3.10395
18C	82.4299	88.6994	93.5733	88.2342	3.22521
18G	111.235	101.121	97.2281	103.195	4.17412
18T	63.1776	68.0171	65.0386	65.4111	1.4094
19C	97.0093	104.478	110.283	103.923	3.84172
19G	91.028	104.478	103.085	99.5302	4.27003
19T	82.0561	99.1471	92.8021	91.3351	4.98798
20A	42.4917	33.6449	32.6226	36.253	3.13324
20C	32.3364	32.8358	33.9332	33.0351	0.471583
20T	37.3749	34.7664	35.1812	35.7742	0.809266
21A	32.4805	34.5794	29.6375	32.2325	1.43199
21G	83.2036	80.9346	79.9574	81.3652	0.961511
21T	66.2959	62.9907	62.2601	63.8489	1.24154

## Sheet: site4
Sample ID	1st	2nd	3rd	Mean	SEM
1T	105.736	95.2646	86.3326	95.7778	5.60723
1C	94.4896	93.8719	93.8497	94.0704	0.209714
1G	117.66	116.713	108.428	114.267	2.93227
2T	61.5176	55.9889	50.7973	56.1012	3.09521
2C	78.1843	70.7521	77.221	75.3858	2.33347
2A	79.991	75.4875	53.5308	69.6697	8.17354
3A	102.304	96.3788	88.7052	95.7959	3.93629
3G	50.691	56.4356	51.9182	53.0149	1.74665
3C	71.7343	73.0198	75.2	72.377	0.52481
4A	83.5991	93.3148	85.877	87.5969	2.93356
4T	88.8383	88.3008	84.738	87.2924	1.28656
4G	92.9991	84.1226	82.2323	86.4513	3.31904
5A	77.4164	75.4875	81.549	78.151	1.78793
5C	64.6793	76.6017	75.3986	72.2265	3.78956
5T	83.9205	83.0084	79.0634	81.9974	1.49047
6G	70.3704	70.195	68.7927	69.786	0.49923
6C	83.4237	89.6936	85.124	86.0804	1.87208
6A	64.2728	64.0669	81.0934	69.811	5.6415
7A	91.7796	84.1226	72.6651	82.8558	5.5541
7C	65.1481	70.195	73.1207	69.4879	2.3285
7T	87.037	85.5153	92.8375	88.4633	2.23077
8A	75.5194	77.7159	75.1708	76.1354	0.796629
8T	93.7669	84.1226	71.5262	83.1386	6.43917
8G	76.3324	72.9805	79.9544	76.4225	2.01371
9A	71.7706	76.6017	67.1982	71.8568	2.7149
9G	64.9503	83.0084	67.1982	71.719	5.68188
9C	70.3252	69.6379	68.3371	69.4334	0.582943
10A	61.1563	75.4875	62.4146	66.3528	4.58177
10T	68.4734	87.1866	73.5537	76.4046	5.58695
10C	49.4128	59.3315	48.5194	52.4212	3.46474
11T	89.7019	81.0585	75.6264	82.1289	4.09834
11G	83.1527	78.8301	74.7153	78.8993	2.43591
11A	58.2204	61.2813	71.9008	63.8009	4.14525
12A	62.8622	64.3564	65.2605	64.1597	0.699282
12C	37.9403	37.1287	36.7246	37.2645	0.357449
12G	40.5707	41.3366	37.7171	39.8748	1.10127
13G	42.1757	47.7723	35.4839	41.8106	3.55205
13A	48.9969	51.2376	50.3722	50.2022	0.652406
13C	35.3544	27.7228	32.0099	31.6957	2.20867
14T	26.4824	22.5248	21.8362	23.6145	1.44768
14A	17.5212	20.0495	17.6179	18.3962	0.827132
14G	32.189	33.1683	29.5285	31.6286	1.08743
15T	20.8649	25	20.5955	22.1535	1.42538
15C	21.712	24.2574	19.603	21.8575	1.34559
15G	33.3928	33.1683	33.7469	33.436	0.168414
16C	22.0241	34.1584	24.8139	26.9988	3.66928
16G	15.8716	21.2871	19.1067	18.7551	1.57318
16A	29.4249	34.901	33.995	32.7736	1.69468
17T	28.4886	37.6238	31.2655	32.4593	2.70379
17C	43.424	43.8119	53.598	46.9446	3.32858
17A	46.5002	46.2871	50.3722	47.7199	1.3276
18C	49.5319	47.7723	50.3722	49.2255	0.766014
18G	57.0218	61.1386	62.531	60.2305	1.65391
18A	68.6135	78.2178	72.2084	73.0132	2.80159
19T	15.292	18.0693	24.5658	19.309	2.74792
19A	14.5787	16.5842	21.34	17.5009	2.00491
19C	16.8524	31.4356	28.536	25.608	4.4571
20A	20.2407	37.6238	30.5211	29.4619	5.04591
20C	15.5595	18.8119	31.5136	21.9617	4.86739
20T	11.235	19.802	21.8362	17.6244	3.24824
21A	36.4244	49.0099	40.6948	42.043	3.69513
21G	62.1935	71.7822	64.7643	66.2466	2.86553
21C	23.5399	34.4059	35.9801	31.3087	3.91087
