# Supplementary material for: High-fidelity SaCas9 identified by directional screening in human cells
Source: PLoS Biol. 2020 Jul 9;18(7):e3000747. doi: 10.1371/journal.pbio.3000747 (PMC7347106; doi:10.1371/journal.pbio.3000747)
Supplement: S3 Table — (XLSX) [file pbio.3000747.s018.xlsx]

## Sheet: Sheet1
S3 Table. Mutagenesis rate of library A using Sanger sequencing
Colony ID	Mutations number /1421 bp
EP1	0
EP2	5
EP3	6
EP4	7
EP5	3
EP6	6
EP7	6
EP8	7
EP9	7
EP10	4
EP11	6
EP12	4
EP13	0
EP14	10
EP15	7
EP16	8
EP17	10
EP18	8
EP19	3
EP20	4
EP21	11
EP22	5
EP23	8
EP24	6
